# Supplementary material
Source: Springer Nature journal article supplement (https://www.springermedizin.de/resource/supplementary/13058_2013_3413_MOESM1_ESM.pdf/9704102)
Supplement: MOESM1 [file 9704102]

**Table S1** Results from the chemical compound screen

Compounds that showed higher inhibition of MCF7-LTED cells

1. 1-(4-Chlorobenzyl)-5-methoxy-2-methylindole-3-acetic acid
2. 3-Amino-1-propanesulfonic acid sodium salt
3. Amoxapine
4. BMY 7378 dihydrochloride
5. Bromoacetyl alprenolol menthane
6. Cantharidic acid
7. Carisoprodol
8. CL 316.243
9. Cyclosporin A
10. Finasteride
11.  $\gamma$ -Acetylinic GABA
12. Paroxetine hydrochloride hemihydrate
13. YC-1

Compounds that showed higher inhibition of MCF7 cells

1. Retinoic acid, 13-cis-retinoic acid
2. b-Chloro-L-alanine hydrochloride
3. L-765.314 ( $\alpha$ 1B- Adrenoreceptor inhibitor)
4. Agmatine sulfate
5. R-(-)-Apomorphine hydrochloride hemihydrate
6. Acetamide
